# Supplementary material
Source: PubMed Central journal article supplement (PMC10546294)
Supplement: jamaneurol-e233400-s001.pdf [file jamaneurol-e233400-s001.pdf]

## Supplementary Online Content

Cerulli Irelli E, Cocchi E, Morano A, et al; Women With Epilepsy Treatment Options and Research (WETOR) Study Group.  
Levetiracetam vs lamotrigine as first-line antiseizure medication in female patients with idiopathic generalized epilepsy. *JAMA Neurol*.  
Published online October 2, 2023. doi:10.1001/jamaneurol.2023.3400

**eFigure.** Missingness of Variables and Combinations of Missingness Using the Intersecting Sets Visualization Method

This supplementary material has been provided by the authors to give readers additional information about their work.

eFigure. Missingness of variables and combinations of missingness using the intersecting sets visualization method

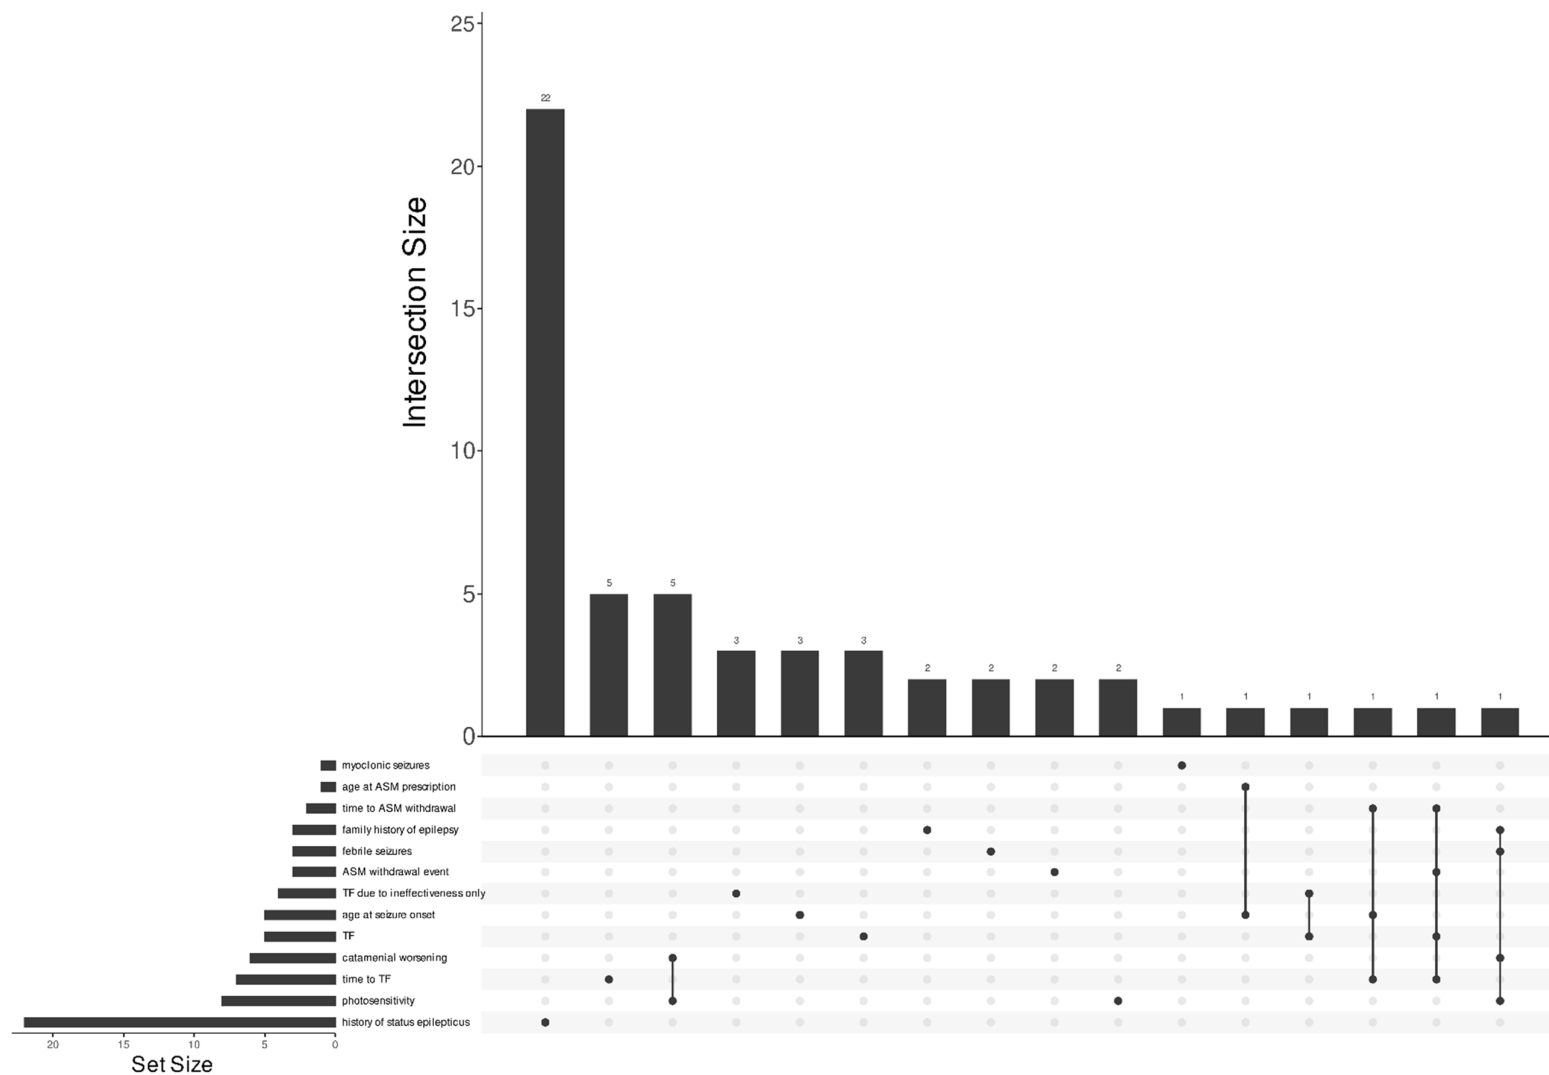

Figure legend: Only variables with at least one missing information are represented in figure. The number of observations missing for each variable is expressed as Set Size (e.g., “photosensitivity” is missing in 7 patients). Intersection plots in the lower part of the figure link different variables missing together in the same participant, whereas the number of times the data is missing alone or in combination is expressed as intersection size (for instance, “history of status epilepticus” is missing in 22 patients, as expressed by the set size, and it is missing in isolation all 22 times as expressed by both intersection plot and intersection size. Conversely, “photosensitivity” is missing in a total of 7 patients as expressed by the set size, 2 times in isolation as and 5 times in combination with “catamenial worsening”, as expressed by the intersection size and intersection plot).
