# Supplementary material
Source: PubMed Central journal article supplement (PMC10546294)
Supplement: jamaneurol-e233400-s002.pdf [file jamaneurol-e233400-s002.pdf]

| <b>*Group Name(s): Women With Epilepsy Treatment Options and Research (WETOR) Study Group</b> |                   |                              |                  |             |                                          |                                                         |                                                                                            |
|-----------------------------------------------------------------------------------------------|-------------------|------------------------------|------------------|-------------|------------------------------------------|---------------------------------------------------------|--------------------------------------------------------------------------------------------|
| <b>*First Name and Middle Initial(s)</b>                                                      | <b>*Last Name</b> | <b>*Suffix (eg, Jr, III)</b> | Academic Degrees | Institution | Location (city, state/province, country) | Role or Contribution, eg, chair, principal investigator | Group (if more than 1 Group listed in the byline) and/or Subgroup (eg, Steering Committee) |
| Daniela                                                                                       | Fatuzzo           |                              |                  |             |                                          |                                                         |                                                                                            |
| Eleonora                                                                                      | Rosati            |                              |                  |             |                                          |                                                         |                                                                                            |
| Giulio                                                                                        | Pastorelli        |                              |                  |             |                                          |                                                         |                                                                                            |
| Biagio                                                                                        | Sancetta          |                              |                  |             |                                          |                                                         |                                                                                            |
| Giovanni                                                                                      | Assenza           |                              |                  |             |                                          |                                                         |                                                                                            |
| Mario                                                                                         | Tombini           |                              |                  |             |                                          |                                                         |                                                                                            |
| Emanuela                                                                                      | Viglietta         |                              |                  |             |                                          |                                                         |                                                                                            |
| Pietro                                                                                        | Pignatta          |                              |                  |             |                                          |                                                         |                                                                                            |
| Vittoria                                                                                      | Cianci            |                              |                  |             |                                          |                                                         |                                                                                            |
| Irene                                                                                         | Bagnasco          |                              |                  |             |                                          |                                                         |                                                                                            |
| Edoardo                                                                                       | Pronello          |                              |                  |             |                                          |                                                         |                                                                                            |
| Marta                                                                                         | Piccioli          |                              |                  |             |                                          |                                                         |                                                                                            |
| Chiara                                                                                        | Milano            |                              |                  |             |                                          |                                                         |                                                                                            |
| Domenica                                                                                      | Battaglia         |                              |                  |             |                                          |                                                         |                                                                                            |
| Marco                                                                                         | Perulli           |                              |                  |             |                                          |                                                         |                                                                                            |
| Francesca                                                                                     | Bisulli           |                              |                  |             |                                          |                                                         |                                                                                            |
| Martina                                                                                       | Fanella           |                              |                  |             |                                          |                                                         |                                                                                            |
| Roberto                                                                                       | De Simone         |                              |                  |             |                                          |                                                         |                                                                                            |
| Giuseppe                                                                                      | Pontrelli         |                              |                  |             |                                          |                                                         |                                                                                            |
| Giovanni                                                                                      | Boero             |                              |                  |             |                                          |                                                         |                                                                                            |
| Francesca                                                                                     | Gilio             |                              |                  |             |                                          |                                                         |                                                                                            |
| Francesca                                                                                     | Gragnani          |                              |                  |             |                                          |                                                         |                                                                                            |
| Biagio                                                                                        | Orlando           |                              |                  |             |                                          |                                                         |                                                                                            |
| Adolfo                                                                                        | Mazzeo            |                              |                  |             |                                          |                                                         |                                                                                            |
| Chiara                                                                                        | Panzini           |                              |                  |             |                                          |                                                         |                                                                                            |
