# Supplementary material
Source: PubMed Central journal article supplement (PMC10546294)
Supplement: jamaneurol-e233400-s003.pdf [file jamaneurol-e233400-s003.pdf]

## Data Sharing Statement

Cerulli Irelli. Levetiracetam vs Lamotrigine As First-Line Antiseizure Medication in Female Patients With Idiopathic Generalized Epilepsy. *JAMA Neurol.* Published October 02, 2023. doi:10.1001/jamaneurol.2023.3400

### Data

**Data available:** No

### Additional Information

**Explanation for why data not available:** Anonymized data will be available to qualified academic investigators to replicate study results and as long as data transfer is in agreement with EU legislation on the general data protection regulation. Data transfer will be regulated by material transfer agreements and should be authorized by institutional Review Boards.
